# Supplementary material for: Structural origins of capacity fading in lithium-polyimide batteries
Source: Royal Society of Chemistry journal article supplement (doi:10.1039/c6ta10520c), 2017-01-01
Supplement: c6ta10520c1.pdf [file c6ta10520c1.pdf]

## Electronic Supplementary Information

# Structural origins of the capacity fading in the lithium-polyimide battery

A. F. Shestakov,<sup>a\*</sup> O. V. Yarmolenko,<sup>a</sup> A. A. Ignatova,<sup>a</sup> A. V. Mumyatov,<sup>a</sup> K. J. Stevenson,<sup>b</sup> and P. A. Troshin<sup>b,a\*</sup>

<sup>a</sup> Institute for Problems of Chemical Physics, Russian Academy of Sciences, 142432, Chernogolovka, Moscow Region, Russian Federation. \*E-mail: a.s@icp.ac.ru, Tel: +7-496-522-5163, Fax: +7-496-522-3507.

<sup>b</sup> Skolkovo Institute of Science and Technology, Skolkovo Innovation Center, Building 3, Moscow, 143026, Russian Federation. \*E-mail: P.Troshin@skoltech.ru, Tel: +7-496-522-1418, Fax: +7-496-522-3507.

## Contents

Fig. S1 Cyclic voltammogram of NDI-HY -cathode vs. Li at a scan rate of 2 mV/s (a) and charge-discharge characteristics showing a single plateau in the 1.5-3.5 V potential range (b). Cycle numbers are indicated near the corresponding curves.

Fig. S2. Coulombic efficiencies (a, c, e) and evolution of the charge-discharge characteristics (b, d, f) of the batteries cycled at different current rates: 2C (a-b); 0.5C (c-d) and 0.1C (e-f). Cycle numbers are indicated near the corresponding curves.

Fig. S3. Coulombic efficiencies (a) and evolution of the charge-discharge characteristics (b) of batteries assembled with polymer electrolyte (current rate is 0.5C). Cycle numbers are indicated near the corresponding curves.

Fig. S4 FTIR spectrum of the NDI-HY

Fig. S5. ESI-MS mass spectra of the electrolyte extracted from the reference non-cycled battery (a) and the battery cycled for 200 cycles at 0.1C (b). Molecular structure of the representative NDI-HY fragment responsible for the appearance of ions  $M^{2+}$  ( $m/z=272$ ),  $[M+EC]^{2+}$  ( $m/z=316$ ),  $[M+2EC]^{2+}$  ( $m/z=360$ ),  $[M+3EC]^{2+}$  ( $m/z=404$ ) and  $[M+4EC]^{2+}$  ( $m/z=448$ ), where EC is ethylene carbonate.

Table S1. Chemical analysis of the NDI-HY polyimide

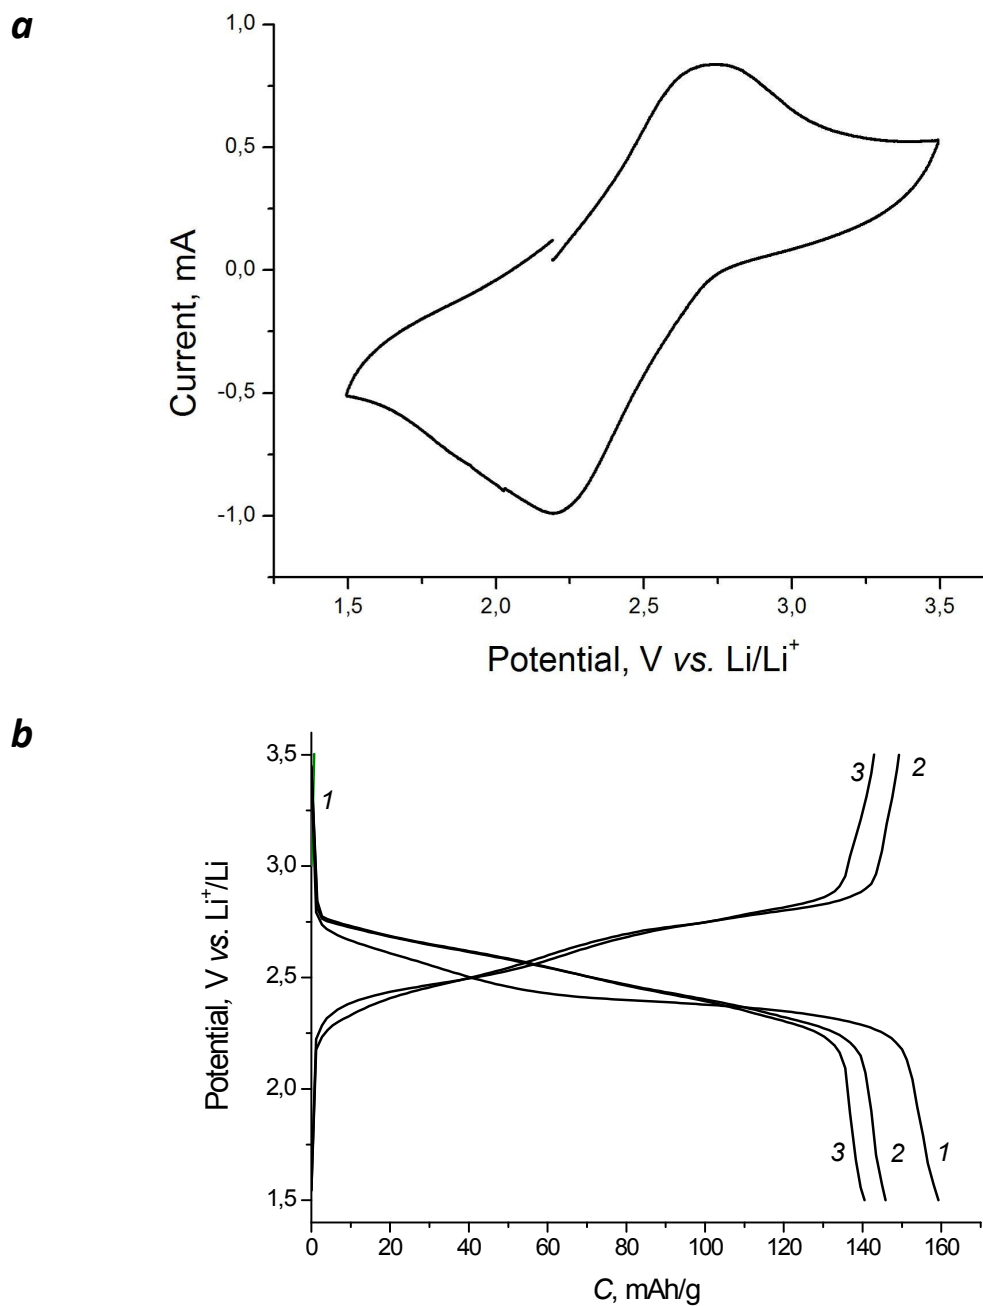

Fig. S1 Cyclic voltammogram of NDI-HY -cathode vs. Li at a scan rate of 2 mV/s (a) and charge-discharge characteristics showing a single plateau in the 1.5-3.5 V potential range (b). Cycle numbers are indicated near the corresponding curves.

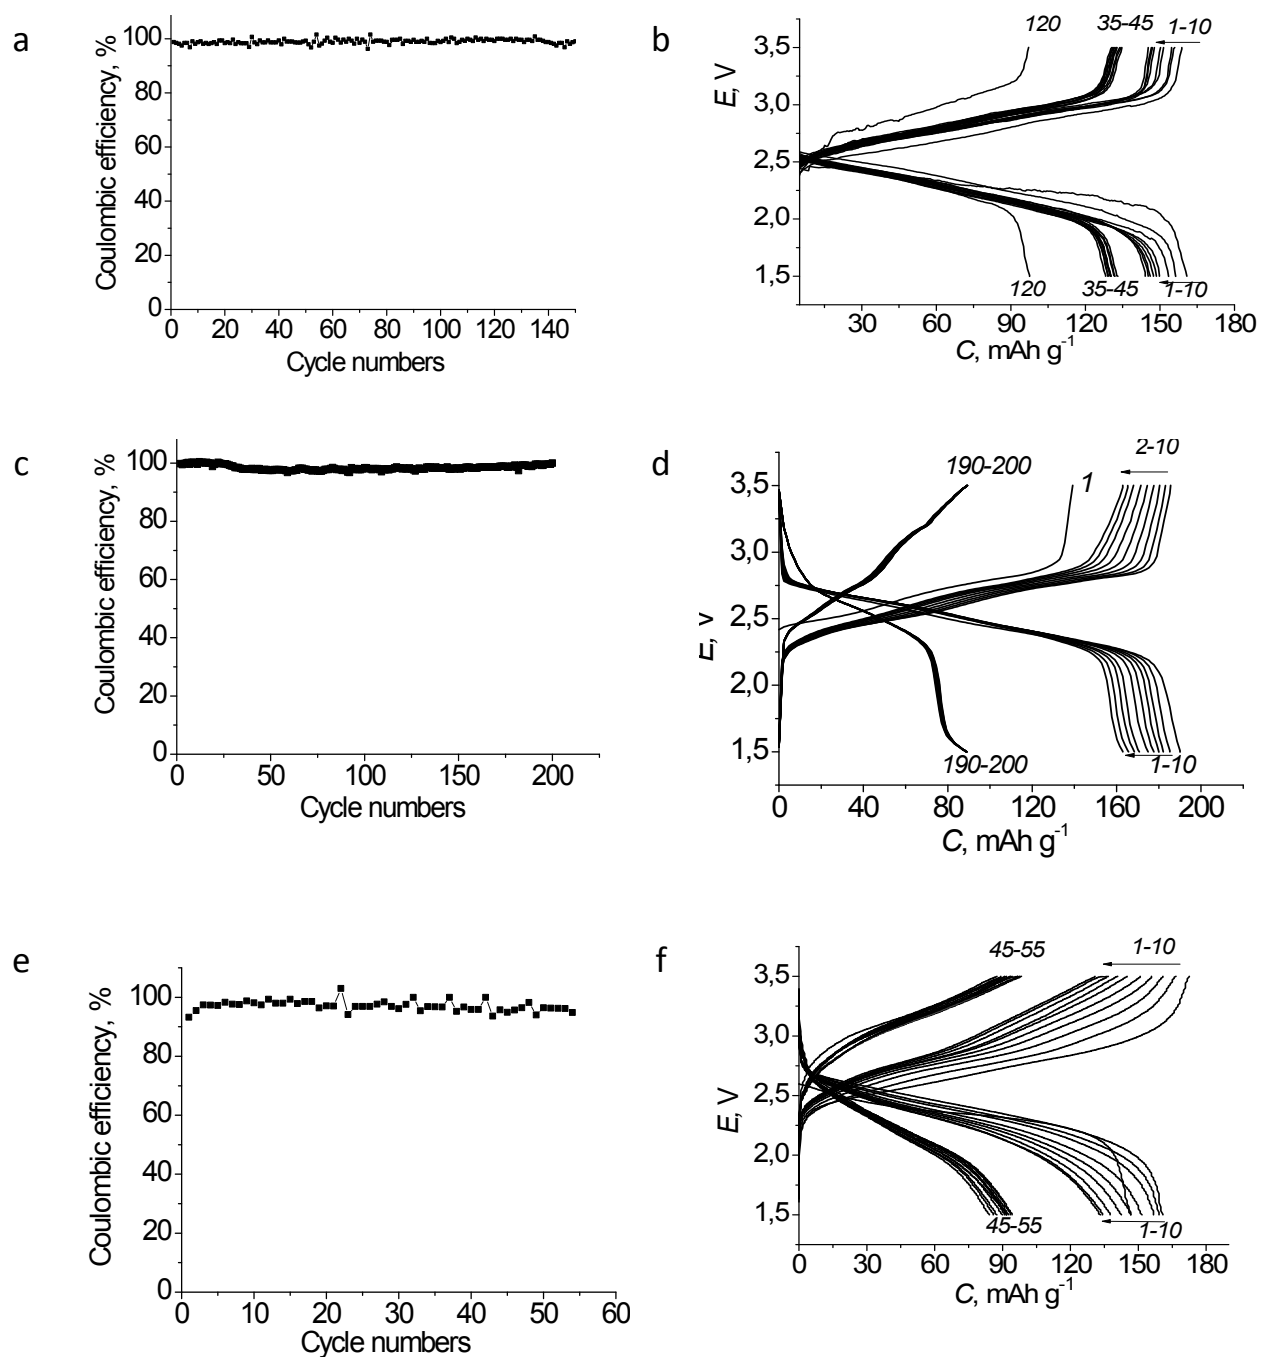

Fig. S2. Coulombic efficiencies (a, c, e) and evolution of the charge-discharge characteristics (b, d, f) of the batteries cycled at different current rates: 2C (a-b); 0.5C (c-d) and 0.1C (e-f). Cycle numbers are indicated near the corresponding curves.

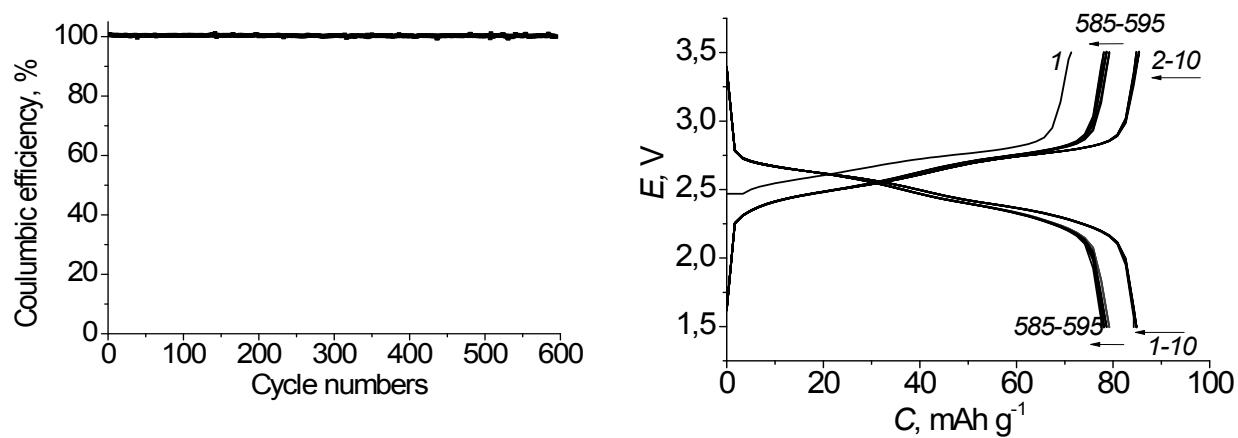

a

b

Fig. S3. Coulombic efficiencies (a) and evolution of the charge-discharge characteristics (b) of batteries assembled with polymer electrolyte (current rate is 0.5C). Cycle numbers are indicated near the corresponding curves.

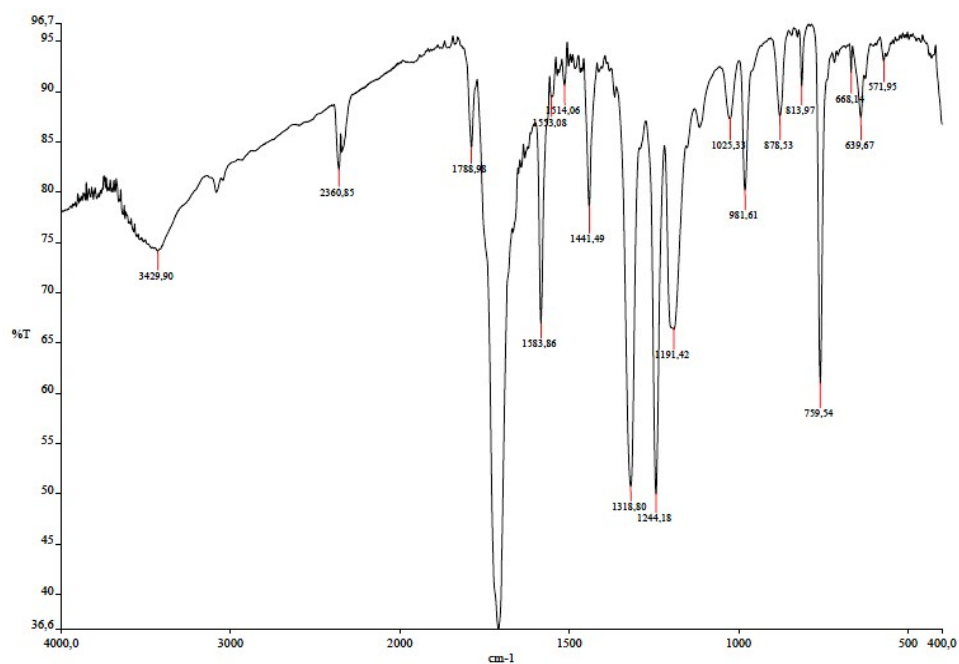

Fig. S4 FTIR spectrum of the NDI-HY

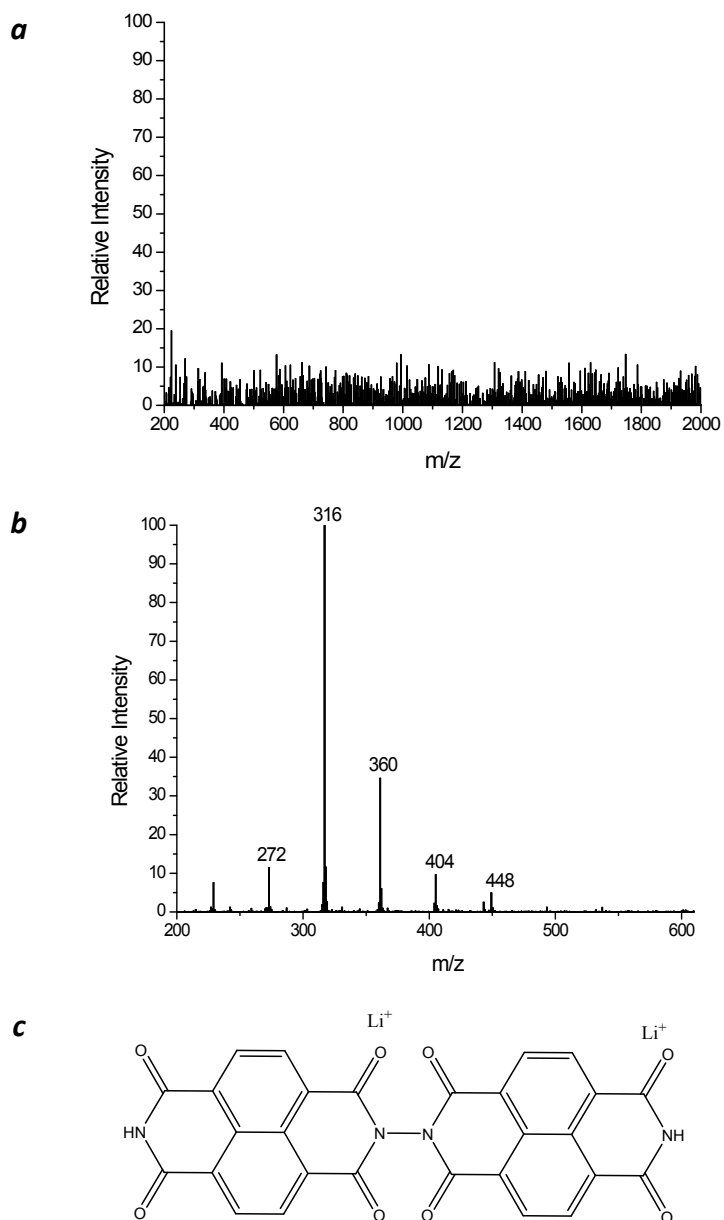

Fig. S5. ESI-MS mass spectra of the electrolyte extracted from the reference non-cycled battery (a) and the battery cycled for 200 cycles at 0.1C (b). Molecular structure of the representative NDI-HY fragment responsible for the appearance of ions  $M^{2+}$  ( $m/z=272$ ),  $[M+EC]^{2+}$  ( $m/z=316$ ),  $[M+2EC]^{2+}$  ( $m/z=360$ ),  $[M+3EC]^{2+}$  ( $m/z=404$ ) and  $[M+4EC]^{2+}$  ( $m/z=448$ ), where EC is ethylene carbonate.

**a**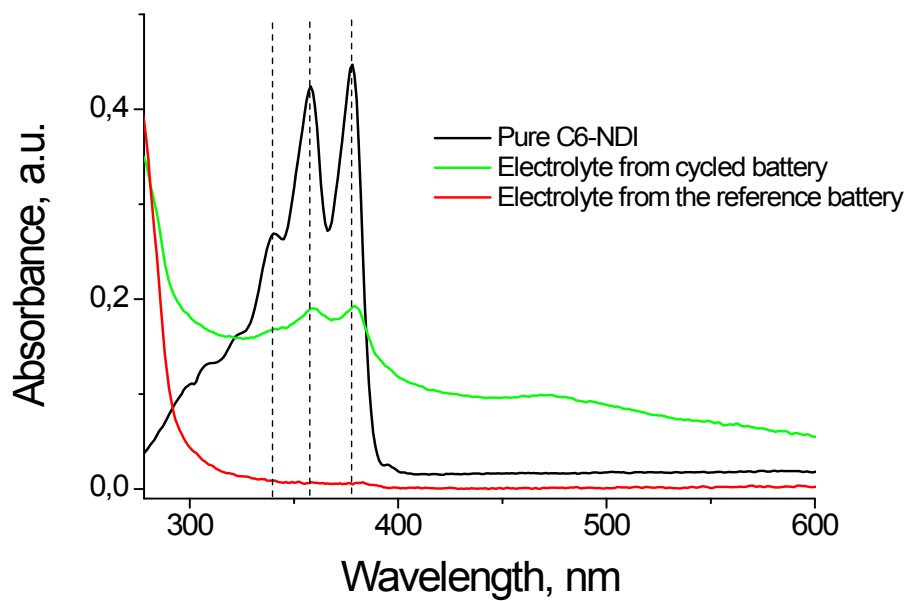**b**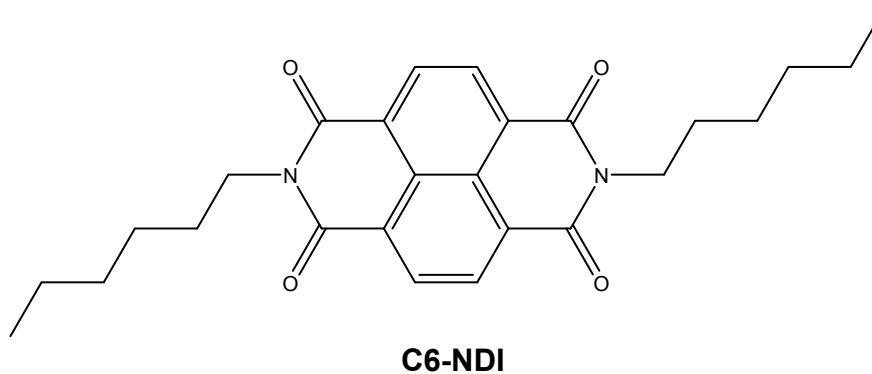

Fig. S6. UV-vis absorption spectra of the electrolyte extracted from the reference non-cycled battery, the battery cycled for 200 cycles at 0.1C and pure naphthalene diimide C6-NDI (a). Molecular structure of C6-NDI (b). Vertical lines in (a) marking characteristic NDI absorption features are given as a guide for eye.

Table S1. Chemical analysis of the NDI-HY polyimide

|            | C, %  | H, % | N, %  |
|------------|-------|------|-------|
| Calculated | 63.65 | 1.53 | 10.60 |
| Found      | 63.37 | 1.61 | 10.42 |
